# Supplementary material
Source: PubMed Central journal article supplement (PMC5861830)
Supplement: AEM.02475-17_zam007188393s1.pdf [file AEM.02475-17_zam007188393s1.pdf]

# Supplementary Material

## Figure S1.

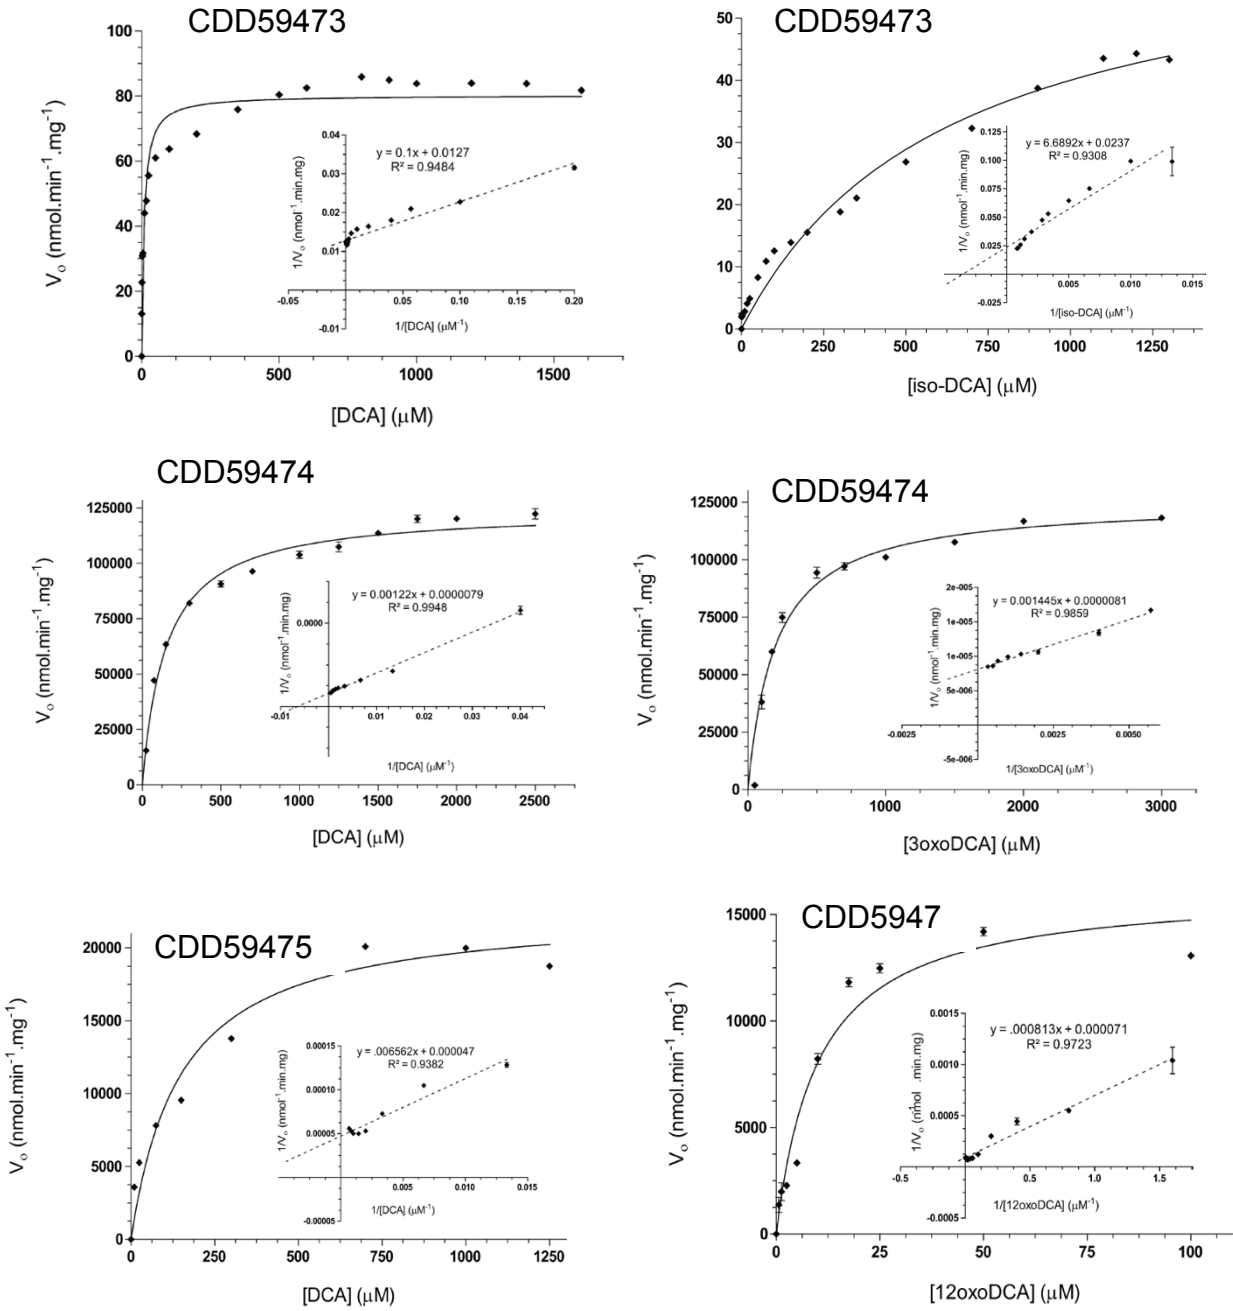

**Figure S1. Kinetic analysis of recombinant CDD59473, CDD59474, and CDD59475 from metagenomic sequence of *Eggerthella* CAG:298** Michaelis-Menten and Lineweaver-Burk plot of initial velocity with varying concentrations of substrate in the oxidative (left panel) and reductive (right panel) directions. Purified recombinant enzyme at a final concentration of 0.05 nM was added to 50  $\mu$ M DCA/12-oxoDCA and 150  $\mu$ M NAD<sup>+</sup>/NADH in 500  $\mu$ l buffer. The oxidation/reduction of NAD(H) was measured by continuous spectrophotometry at 340 nm for 5 min and the initial velocities were used calculated to calculate kinetic constants (Table 1). Each data-point represents  $\pm$  S.E.M from four independent experiments.

Figure S2.

a.

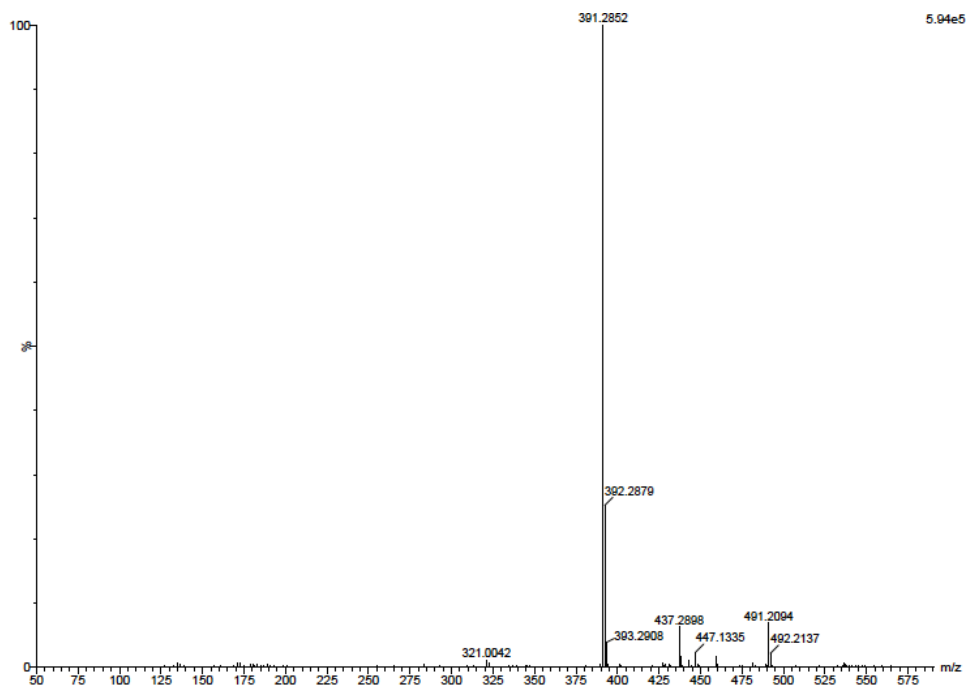

b.

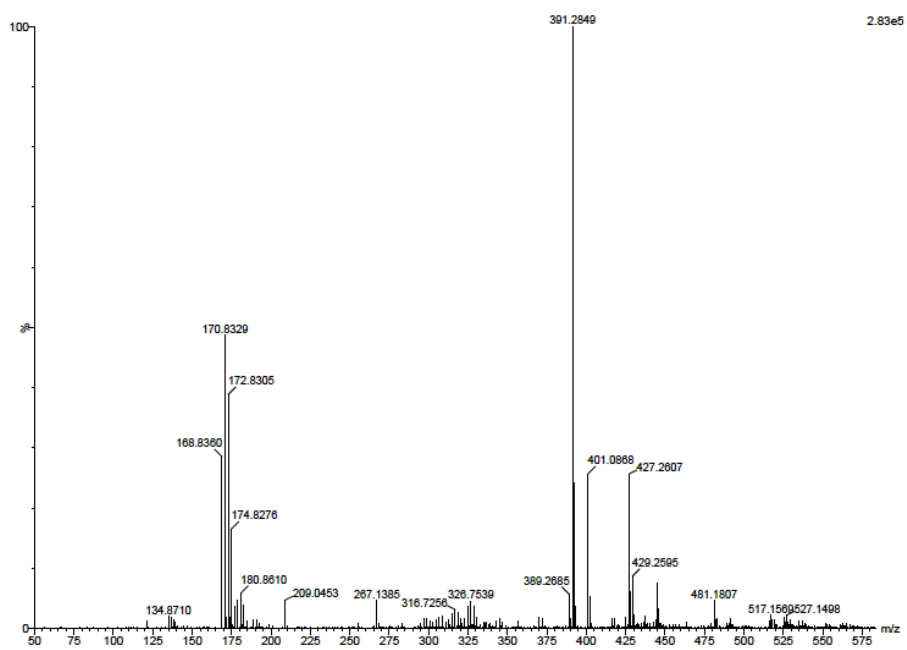

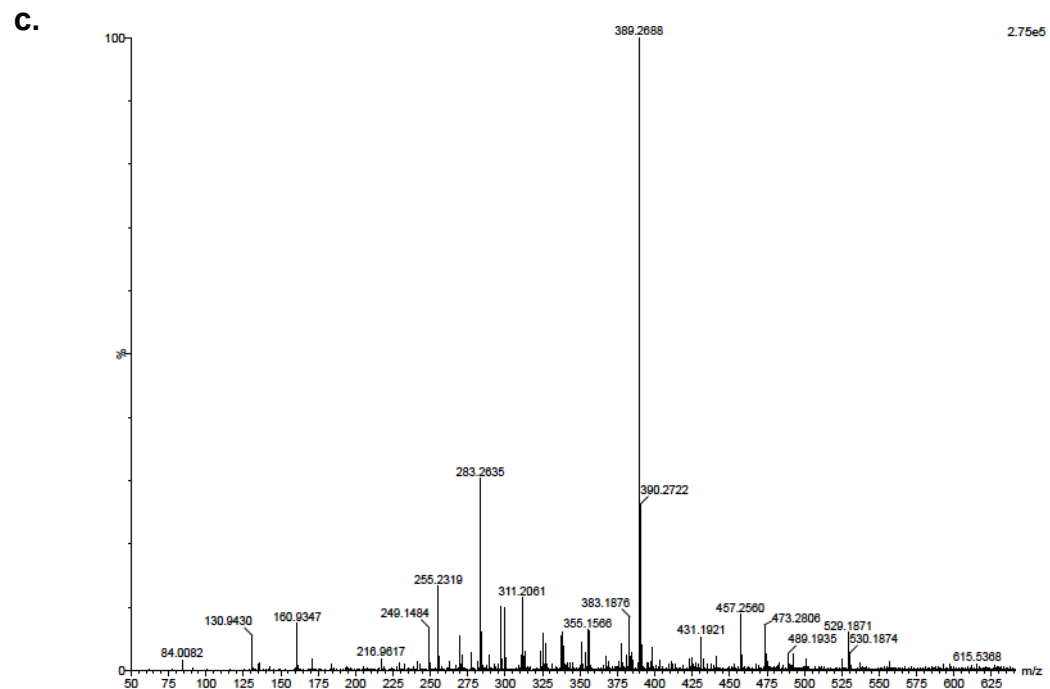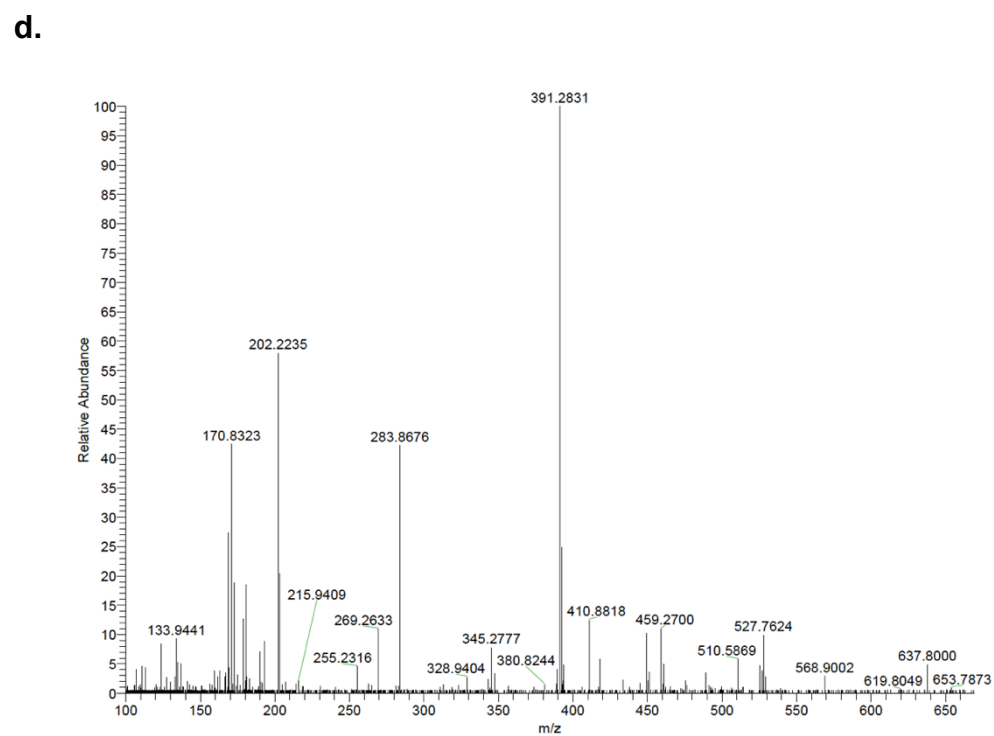

**Figure S2. Mass spectrometry of enzymatic reaction products. a.) DCA standard, scraped from TLC plate after resolution in solvent system 75:20:2**

toluene:dioxane:glacial acetic acid (v/v/v). **b.**) MS analysis of reaction product co-migrating with iso-DCA, catalyzed by rCDD59473 in the presence of NADPH and 3-oxoDCA (see Fig. 2A) **c.**) MS analysis of reaction product co-migrating with 3-oxoDCA, catalyzed by rCDD59474 in the presence of NADP<sup>+</sup> and DCA (TLC not shown). **d.**) MS analysis of reaction product co-migrating with 12-oxoDCA, catalyzed by rCDD59475 in the presence of NADPH (see Fig. 2C).

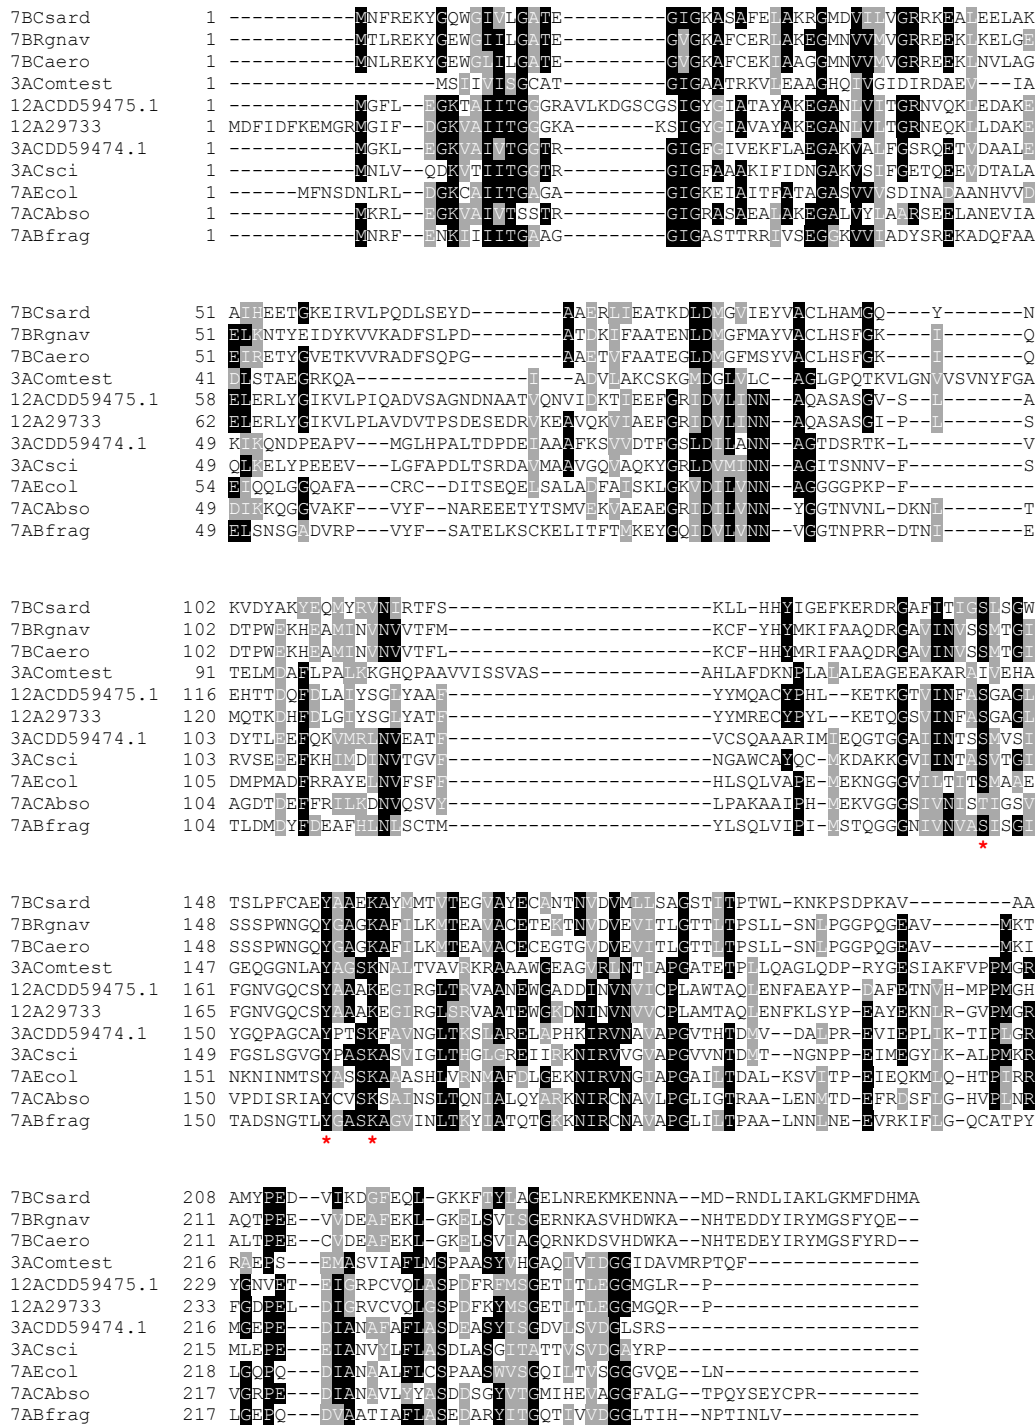

**Figure S3. CLUSTAL alignment of biochemically characterized gut bacterial hydroxysteroid dehydrogenases. Circles represent conserved pyridine nucleotide**

binding sites; asterisks (\*) represent active-site residues conserved in SDR-family.

“7BCsard” AET80684.1 7-beta-hydroxysteroid dehydrogenase *Clostridium sardiniense*;

“7BRgnav” AGN52919.1 7-beta-hydroxysteroid dehydrogenase *Ruminococcus gnavus*;

“7BCaero” CZQ36308.1 unnamed protein product *Collinsella aerofaciens*; “3AComtest”

WP\_003078312.1 3-alpha-hydroxysteroid dehydrogenase/carbonyl reductase

*Comamonas testosteroni*; “12A29733” ERJ00208.1 oxidoreductase, short chain

dehydrogenase/reductase family protein *Clostridium* sp. ATCC 29733; “3ACSci”

AAC45414.1 3-alpha hydroxysteroid dehydrogenase *Clostridium scindens*; “7AEcoi”

>AKF67908.1 7-alpha-hydroxysteroid dehydrogenase, NAD-dependent *Escherichia coli*;

“7ABfrag” AAD49430.2 7-alpha-hydroxysteroid dehydrogenase *Bacteroides fragilis*;

“7ACADSO” 5EPO\_A Chain A, The Three-dimensional Structure Of *Clostridium*

*absonum* 7alpha-hydroxysteroid dehydrogenase.

**Table S1: Sequences used in phylogenetic analysis**

| Phylogenetic tree identifier | Protein Locus Tag | Function                   | Organism                                       | Ref    |
|------------------------------|-------------------|----------------------------|------------------------------------------------|--------|
| 3A_CDD59473                  | CDD59473          | 3 $\alpha$ -HSDH           | <i>Eggerthella</i> sp.<br>CAG:298              | TS     |
| 3A_CDD59474                  | CDD59474          | 3 $\alpha$ -HSDH           | <i>Eggerthella</i> sp.<br>CAG:298              | TS     |
| 12A_CDD59475                 | CDD59475          | 12 $\alpha$ -HSDH          | <i>Eggerthella</i> sp.<br>CAG:298              | TS     |
| 3A_Elen_0690                 | Elen_0690         | 3 $\alpha$ -HSDH           | <i>Eggerthella lenta</i> DSM<br>2243           | 13     |
| 3B_Elen_1325                 | Elen_1325         | 3b-HSDH                    | <i>Eggerthella lenta</i> DSM<br>2243           | 13     |
| 3B_Elen_0198                 | Elen_0198         | 3b-HSDH                    | <i>Eggerthella lenta</i> DSM<br>2243           | 13     |
| 3A_Rumgna_02133              | Rumgna_02133      | 3 $\alpha$ -HSDH           | <i>Ruminococcus gnavus</i> ATCC<br>29149       | 13     |
| 3B_Rumgna_00694              | 3B_Rumgna_00694   | 3b-HSDH                    | <i>Ruminococcus gnavus</i> ATCC<br>29149       | 13     |
| 12A_COLAER_RS06615           | COLAER_RS06615    | putative 12 $\alpha$ -HSDH | <i>Collinsella aerofaciens</i><br>ATCC 25986   | 30     |
| 12A_COPCOM_01375             | COPCOM_01375      | putative 12 $\alpha$ -HSDH | <i>Coproccoccus comes</i> ATCC<br>27758        | 30     |
| 7A_Ecoli                     | BAA01384          | 7 $\alpha$ -HSDH           | <i>Escherichia coli</i>                        | 53     |
| 3A_BAIA2Csi                  | BAIA2_CLOSV       | 3 $\alpha$ -HSDH           | <i>Clostridium scindens</i><br>ATCC 35704      | 38, 39 |
| 3A_BAIAChyl                  | ACF20977          | 3 $\alpha$ -HSDH           | <i>Clostridium hylemonae</i><br>DSM 15053      | 54     |
| 3A_BAIAChir                  | EEA86309          | 3 $\alpha$ -HSDH           | <i>Clostridium hiranonis</i> DSM<br>13275      | 55     |
| 3A_RUMHYD_02185              | RUMHYD_02185      | putative 3 $\alpha$ -HSDH  | <i>Blautia hydrogenotropica</i> DSM<br>10507   | 30     |
| 12A_Csp29733                 | ERJ00208.1        | 12 $\alpha$ -HSDH          | <i>Clostridium</i> sp.<br>strain ATCC<br>29733 | 15, 29 |



|                    |                    |                           |                                                 |                      |
|--------------------|--------------------|---------------------------|-------------------------------------------------|----------------------|
| 3A_DORFOR_00173    | DORFOR_00173       | putative 3 $\alpha$ -HSDH | <i>Dorea formicigenerans</i> ATCC 27755         | 30                   |
| 3A_RUMTOR_01195    | RUMTOR_01195       | putative 3 $\alpha$ -HSDH | <i>Ruminococcus torques</i> ATCC 27756          | 30                   |
| 3A_RUMOBE_03494    | RUMOBE_03494       | putative 3 $\alpha$ -HSDH | <i>Ruminococcus obeum</i> ATCC 29174            | 30                   |
| 7A_NP_810824Beth   | NP_810824          | putative 7 $\alpha$ -HSDH | <i>Bacteroides thetaiotaomicron</i> VPI-5482    | 10, 30, 61           |
| 3A_EDT24590.1Cperf | EDT24590.1         | putative 3 $\alpha$ -HSDH | <i>Clostridium perfringens</i> B str. ATCC 3626 | 27, 56               |
| 7A_AAA53556.1Csord | AAA53556.1         | 7 $\alpha$ -HSDH          | <i>Clostridium sordellii</i> ATCC 9714          | 57                   |
| 7A_CsciAAB61151.1  | AAB61151.1         | 7 $\alpha$ -HSDH          | <i>Clostridium scindens</i> VPI 12708           | 58                   |
| 7A_CLOHIR_RS06190  | CLOHIR_RS06190     | putative 7 $\alpha$ -HSDH | <i>Clostridium hiranonis</i> DSM 13275          | 30                   |
| 7A_BACOVA_01473    | BACOVA_01473       | putative 7 $\alpha$ -HSDH | <i>Bacteroides ovatus</i> ATCC 8483             | 30                   |
| 7A_BF9343_RS16010  | 7A_BF9343_RS16010  | putative 7 $\alpha$ -HSDH | <i>Bacteroides fragilis</i> NCTC 9343           | 30                   |
| 7A_BACFIN_RS13120  | BACFIN_RS13120     | putative 7 $\alpha$ -HSDH | <i>Bacteroides fingoldii</i> DSM 17565          | 30                   |
| 7A_ANACAC_03661    | 7A_ANACAC_03661    | putative 7 $\alpha$ -HSDH | <i>Anaerostipes caccae</i> DSM 14662            | 30                   |
| 7A_CD630_00650     | CD630_00650        | putative 7 $\alpha$ -HSDH | <i>Clostridium difficile</i> 630                | 30                   |
| 7B_COLAER_RS09325  | COLAER_RS09325     | 7b-HSDH                   | <i>Collinsella aerofaciens</i> ATCC 25986       | 59, 60               |
| 7B_RUMGNA_RS11340  | RUMGNA_RS11340     | 7b-HSDH                   | <i>Ruminococcus gnavus</i> ATCC 29149           | 41                   |
| 12A_CLOHYLEM_04236 | 12A_CLOHYLEM_04236 | 12 $\alpha$ -HSDH         | <i>Clostridium hylemonae</i> DSM 15053          | 30, unpublished data |

|                  |                |                                  |                                                 |                            |
|------------------|----------------|----------------------------------|-------------------------------------------------|----------------------------|
| 12A_CLOSCI_02455 | CLOSCI_02455   | putative 12 $\alpha$ -HSDH       | <i>Clostridium scindens</i><br>ATCC 35704       | 30,<br>unpublished<br>data |
| 12A_COLAER_01483 | COLAER_01483   | putative 12 $\alpha$ -HSDH       | <i>Collinsella aerofaciens</i><br>ATCC 25986    | 30                         |
| 20B_Bdes         | WP_051643274.1 | 20b-HSDH                         | <i>Butyricoccus demolans</i><br>ATCC 43058      | 40                         |
| 20B_Ccad1        | WP_051196374.1 | 20b-HSDH                         | <i>Clostridium cadaveris</i><br>AGR2141         | 40                         |
| 20B_Ccad2"       | WP_027640050   | 20b-HSDH                         | <i>Clostridium cadaveris</i><br>AGR2141         | 40                         |
| 20B_BScar        | BAQ31198.1     | 20b-HSDH                         | <i>Bifidobacterium scardovii</i><br>DSM 13734   | 40                         |
| 20B_Plym         | WP_024111275.1 | 20b-HSDH                         | <i>Propionimicrobium</i> sp. BV2F7              | 40                         |
| WP_025022266.1   | WP_025022266.1 | aldo/keto reductase              | <i>Lactobacillus hayakitensis</i>               | TS                         |
| KRM19149.1       | KRM19149.1     | oxidoreductase                   | <i>Lactobacillus hayakitensis</i><br>DSM 18933  | TS                         |
| KRM65245.1       | KRM65245.1     | oxidoreductase                   | <i>Lactobacillus agilis</i> DSM<br>20509        | TS                         |
| WP_050611824.1   | WP_050611824.1 | aldo/keto reductase              | <i>Lactobacillus agilis</i>                     | TS                         |
| WP_019206370.1   | WP_019206370.1 | aldo/keto reductase              | <i>Lactobacillus ingluviei</i>                  | TS                         |
| KRL88436.1       | KRL88436.1     | organophosphate reductase        | <i>Lactobacillus ingluviei</i> DSM<br>15946     | TS                         |
| ASN60792.1       | ASN60792.1     | aldo/keto reductase              | <i>Lactobacillus curvatus</i>                   | TS                         |
| WP_085844664.1   | WP_085844664.1 | aldo/keto reductase              | <i>Lactobacillus curvatus</i>                   | TS                         |
| WP_054778020.1   | WP_054778020.1 | aldo/keto reductase              | <i>Lactobacillus saniviri</i>                   | TS                         |
| BAN77682.1       | BAN77682.1     | conserved hypothetical protein   | <i>Adlercreutzia equolifaciens</i><br>DSM 19450 | TS                         |
| WP_041715350.1   | WP_041715350.1 | SDR family oxidoreductase        | <i>Adlercreutzia equolifaciens</i>              | TS                         |
| CDD77593.1       | CDD77593.1     | putative uncharacterized protein | <i>Cryptobacterium</i> sp.<br>CAG:338           | TS                         |

|                |                |                                             |                                          |    |
|----------------|----------------|---------------------------------------------|------------------------------------------|----|
| CDD68244.1     | CDD68244.1     | putative uncharacterized protein            | <i>Eggerthella</i> sp. CAG:368           | TS |
| CDB33831.1     | CDB33831.1     | putative uncharacterized protein            | <i>Eggerthella</i> sp. CAG:209           | TS |
| CCY06514.1     | CCY06514.1     | putative uncharacterized protein            | <i>Eggerthella</i> sp. CAG:1427          | TS |
| CDD56334.1     | CDD56334.1     | putative uncharacterized protein            | <i>Bacteroides pectinophilus</i> CAG:437 | TS |
| WP_044925038.1 | WP_044925038.1 | short-chain dehydrogenase                   | <i>Anaerostipes hadrus</i>               | TS |
| WP_008116638.1 | WP_008116638.1 | NAD(P)-dependent oxidoreductase             | <i>Bacteroides pectinophilus</i>         | TS |
| WP_077326212.1 | WP_077326212.1 | short-chain dehydrogenase                   | <i>Anaerostipes hadrus</i>               | TS |
| OKZ9660.1      | OKZ9660.1      | short-chain dehydrogenase                   | Clostridiales bacterium Nov_37_41        | TS |
| WP_055161728.1 | WP_055161728.1 | short-chain dehydrogenase                   | <i>Anaerostipes hadrus</i>               | TS |
| WP_055258939.1 | WP_055258939.1 | short-chain dehydrogenase                   | <i>Anaerostipes hadrus</i>               | TS |
| CCX88977.1     | CCX88977.1     | dehydrogenases with different specificities | <i>Clostridium</i> sp. CAG:590           | TS |
| WP_009265642.1 | WP_009265642.1 | short-chain dehydrogenase                   | Lachnospiraceae bacterium 5_1_63FAA      | TS |

**TS = This study**
